# Supplementary material for: Individual behavioral type captured by a Bayesian model comparison of cap making by sponge crabs
Source: PeerJ journal article supplement (doi:10.7717/peerj.9036), 2020-05-14

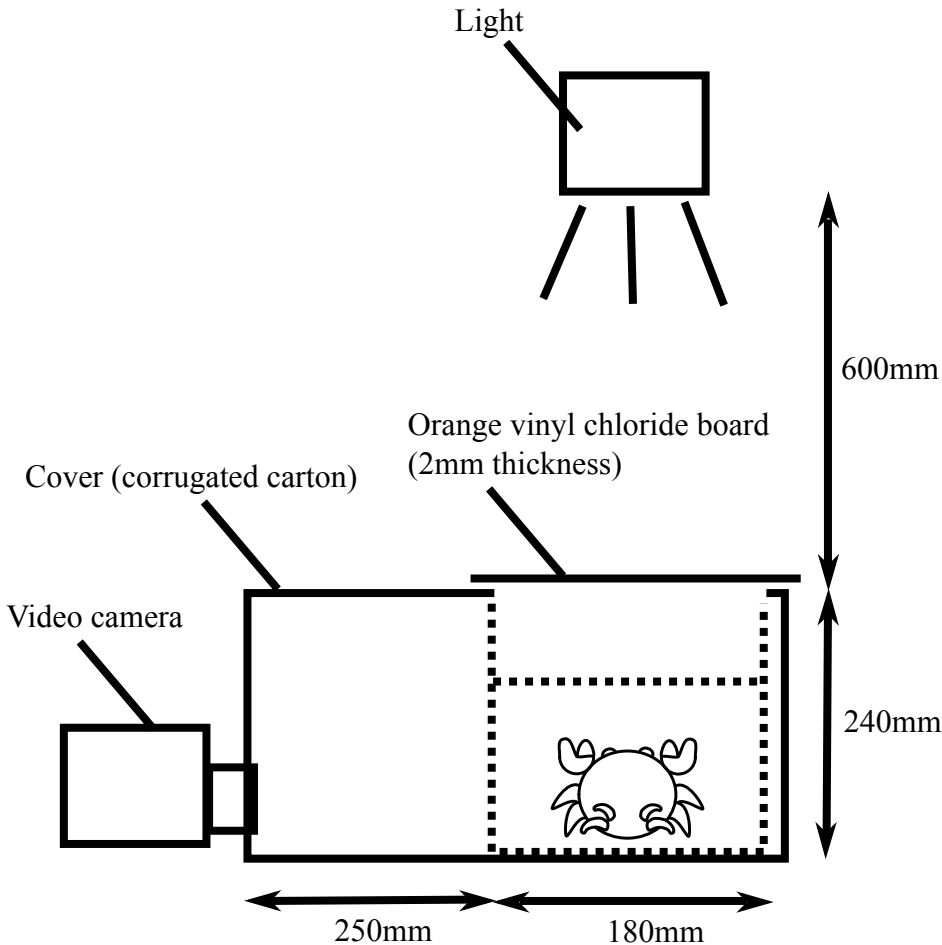

Supplement: suplementary_fig1.pdf [file suplementary_fig1.pdf]
